# Supplementary material for: Pharmacological guidelines for schizophrenia: a systematic review and comparison of recommendations for the first episode
Source: PubMed Central journal article supplement — BMJ Open. 2017 Jan 6;7(1):e013881. doi: 10.1136/bmjopen-2016-013881 (PMC5223704; doi:10.1136/bmjopen-2016-013881), 2017-01-06
Supplement: bmjopen-2016-013881supp_appendix1.pdf [file bmjopen-2016-013881supp_appendix1.pdf]

## Appendix 1. Search terms and search strategy

The search terms used for PubMed were "Psychotropic Drugs"[Mesh], "antipsychotic"[All Fields], "antipsychotics"[All Fields] "guideline"[Publication Type] "guidelines as topic"[MeSH Terms], "guidelines"[All Fields]), "guideline"[All Fields], "consensus development conference"[Publication Type] "consensus development conferences as topic"[MeSH Terms]"consensus"[All Fields] "recommend"[All Fields] "recommends"[All Fields] "recommendation"[All Fields], "recommendations"[All Fields], "Schizophrenia and Disorders with Psychotic Features"[Mesh], "schizophrenia"[All Fields], "schizophrenic"[All Fields], "schizophreniform"[All Fields] "psychosis"[All Fields], "psychotic"[All Fields], "schizoaffective"[All Fields]

The search terms used for Embase were "schizophrenia"[All Fields], "schizophrenic"[All Fields], "schizophreniform"[All Fields] "psychosis"[All Fields], "psychotic"[All Fields], "schizoaffective"[All Fields], 'schizophrenia'/exp, 'psychotropic agent'/exp, "antipsychotic"[All Fields], "antipsychotics"[All Fields], 'practice guideline'/exp, "guideline"[All Fields], "guidelines"[All Fields] "consensus"[All Fields] "recommend"[All Fields] "recommends"[All Fields] "recommendation"[All Fields], "recommendations"[All Fields],

The guideline repositories searched were the Guidelines International Network, National Guidelines Clearing House, National Institute for Health and Care Excellence, Scottish Intercollegiate Guidelines Network, Canadian Medical Association Infobase, British Columbia Ministry of Health, Australian National Health and Medical Research Council, Australian Government clinical Practice Guidelines Portal, New Zealand Guidelines Group, German National Disease Management Guideline Programme.

The specialist association websites searched were; Canadian Psychiatric Association, Canadian agency for Drugs and Technology in Health, Substance Abuse and Mental Health Services, Administration, American Psychiatric Association, Veterans Affairs United States, World Society of Biological Psychiatry, Australia and New Zealand Psychiatric Association, European Psychiatric Association, International Psychopharmacology Algorithm Project, British Association for Psychopharmacology, Texas Medication Algorithm Project, world Psychiatric Association, International Early Psychosis Association, Early Psychosis Prevention and Intervention Centre, Lambeth Early Onset Services, Early Detection and Treatment of Psychosis (TIPS) Norway, Prevention and Early Intervention for Psychosis Programme Canada, South London and Maudsley NHS Trust Prescribing Guidelines.
