# Supplementary material for: Pharmacological guidelines for schizophrenia: a systematic review and comparison of recommendations for the first episode
Source: PubMed Central journal article supplement — BMJ Open. 2017 Jan 6;7(1):e013881. doi: 10.1136/bmjopen-2016-013881 (PMC5223704; doi:10.1136/bmjopen-2016-013881), 2017-01-06
Supplement: bmjopen-2016-013881supp_appendix3.pdf [file bmjopen-2016-013881supp_appendix3.pdf]

**Appendix 3. Comparison of recommendations from schizophrenia clinical practice guidelines. Data extracted in relation to key health questions that are relevant to a clinician adopting an algorithmic approach to the pharmacological treatment of first episode schizophrenia. Where levels of evidence or grades of recommendation were attributed to a recommendation this appears in brackets beside the recommendation. See Appendix 1 Levels of Evidence and Grades of Recommendation used in Clinical Practice Guidelines for Schizophrenia in supplementary material for further information.**

|                                              | PORT, 2009                                    | Spain, 2009                                                                                      | Malaysia, 2009           | Singapore, 2009     | BAP, 2011                                                                                                                                                                                                                                       | WFSBP, 2012                                                                                                                                                                                                                                                                                                                                                | SIGN, 2013                                                                                                                                                                                                                                                                                                                                                                                                     | Harvard, 2013                                           | NICE                                                                                                                                                                                                                                                                                                                                | RANZCP, 2016                                                                                                                                                                                                                                                                                         |
|----------------------------------------------|-----------------------------------------------|--------------------------------------------------------------------------------------------------|--------------------------|---------------------|-------------------------------------------------------------------------------------------------------------------------------------------------------------------------------------------------------------------------------------------------|------------------------------------------------------------------------------------------------------------------------------------------------------------------------------------------------------------------------------------------------------------------------------------------------------------------------------------------------------------|----------------------------------------------------------------------------------------------------------------------------------------------------------------------------------------------------------------------------------------------------------------------------------------------------------------------------------------------------------------------------------------------------------------|---------------------------------------------------------|-------------------------------------------------------------------------------------------------------------------------------------------------------------------------------------------------------------------------------------------------------------------------------------------------------------------------------------|------------------------------------------------------------------------------------------------------------------------------------------------------------------------------------------------------------------------------------------------------------------------------------------------------|
| <b>Initial presentation</b>                  |                                               |                                                                                                  |                          |                     |                                                                                                                                                                                                                                                 |                                                                                                                                                                                                                                                                                                                                                            |                                                                                                                                                                                                                                                                                                                                                                                                                |                                                         |                                                                                                                                                                                                                                                                                                                                     |                                                                                                                                                                                                                                                                                                      |
| Initial oral antipsychotic for FE (Not Cloz) | FGA or SGA. Not OLZ                           | SGA eg Risp, Olz, Quet, Ami, Ari (A)<br><br>24-48 hour observation period with option of BDZ (C) | SGA Ami or Olz (Grade A) | SGA or FGA (A, 1++) | SGA or FGA (A). If FGA chosen this 'should probably' be a medium or low potency drug (S).                                                                                                                                                       | FGA and SGA both effective (A, 1). SGA preferred (C3, 4).<br><br>Level of evidence available for each antipsychotic in FE Schizophrenia tabulated. Can be assumed that other antipsychotics will work but currently no evidence to make an evidence based recommendation.<br><br>Olz, Risp and Quet best SGA<br>Hpd is only FGA with evidence (Not graded) | FGA or SGA (A)<br>Not Cloz                                                                                                                                                                                                                                                                                                                                                                                     | SGA preferably Ami, Ari, Risp, Zip. Not Cloz, Olz, Quet | Offer oral FGA or SGA                                                                                                                                                                                                                                                                                                               | Allow drug-free assessment with BDZ for relevant symptoms*<br><br>SGA (Ami, Ari, Quet, Risp, Zip) (CBR)<br><br>Not Olz                                                                                                                                                                               |
| Other considerations                         | Not Olz due to risk of metabolic side effect. | Establish a therapeutic alliance (A)                                                             |                          |                     | Base choice on:<br><br>Relative liability for side effects especially EPSE and metabolic problems (B)<br><br>Individual patient preference (S)<br><br>Individual patient risk factors from side effects (B)<br><br>Relevant medical history (S) | SGA chosen because of reduced risk of neurological side effects (C3, 4).<br><br>Guide treatment decision by side effect profile, individual considerations.                                                                                                                                                                                                | Healthcare professionals and service users should work together to find the most appropriate medication at lowest effective dose. Discuss potential benefit and harm. Consider service user preference (GPP)<br><br>Recommendations made based on specific side effect concerns of service users:<br>Weight Gain: Hpd, Ari, Ami (A)<br>EPSE: SGA, low potency FGA (B)<br>TD: SGA (B)<br>Sedation: HPD, Ari (B) |                                                         | Provide information, discuss benefits and risks.<br><br>Treatment should be considered an explicit individual therapeutic trial.<br><br>Advise people who want to try psychological interventions alone that these are more effective when delivered in conjunction with antipsychotic medication. If the person still wants to try | Olz not recommended for initial treatment for a first episode of schizophrenia<br><br>Base choice on individual preference once risks and benefits have been explained, prior response, clinical response to an adequate trial, individual tolerability, potential long-term adverse effects (EBR I) |

|                                                                                              |                                                                         |                                          |                        |                                           |                                      |                                                                                                                                                                                                   |                      |                    |                                                                                                                                  |                                                                  |
|----------------------------------------------------------------------------------------------|-------------------------------------------------------------------------|------------------------------------------|------------------------|-------------------------------------------|--------------------------------------|---------------------------------------------------------------------------------------------------------------------------------------------------------------------------------------------------|----------------------|--------------------|----------------------------------------------------------------------------------------------------------------------------------|------------------------------------------------------------------|
|                                                                                              |                                                                         |                                          |                        |                                           |                                      |                                                                                                                                                                                                   |                      |                    | psychological interventions alone agree a time (1 month or less) to review treatment options including antipsychotic medication. |                                                                  |
| Dose                                                                                         | Start with doses lower than recommended for multi-episode schizophrenia | Low dose (B)                             | Lower dose             | Lower end of licensed dose range (A, 1++) | Lower end of licensed dose range (A) | Lower end of standard dose range (A, 1). Evidence for this recommendation for Hpd, Olz, Risp, only.<br><br>Sparse evidence for this treatment recommendation for other antipsychotics (C1/D, 4/5) | Lowest effective (D) | Minimum effective  | Start at lower end of dose range and titrate up.                                                                                 | Lowest effective dose (EBR, II). Target doses suggested          |
| Dose in FE                                                                                   | FGA                                                                     | Start at 300-500 mg Cpz Eq               |                        | 300-1000mg Cpz Eq (Level 1)               | 300-1000 Cpz Eq (A, 1++)             |                                                                                                                                                                                                   |                      | 300-1000 mg Cpz Eq |                                                                                                                                  |                                                                  |
|                                                                                              | Cpz                                                                     |                                          | 75-300mg/day           |                                           |                                      |                                                                                                                                                                                                   |                      |                    |                                                                                                                                  |                                                                  |
|                                                                                              | Sulp                                                                    |                                          | 400-800mg              |                                           | 200-400mg                            |                                                                                                                                                                                                   |                      |                    |                                                                                                                                  |                                                                  |
|                                                                                              | Triflu                                                                  |                                          | 10mg to start          |                                           | 5-20mg                               |                                                                                                                                                                                                   |                      |                    |                                                                                                                                  |                                                                  |
|                                                                                              | Hpd                                                                     |                                          | 3-9 mg daily           |                                           | 5-20mg                               |                                                                                                                                                                                                   |                      |                    |                                                                                                                                  |                                                                  |
|                                                                                              | Olz                                                                     | Lower half of dose range                 | 5-20mg/day             |                                           | 10-20mg                              |                                                                                                                                                                                                   | <5mg (B, 3)          |                    | 10-20 mg                                                                                                                         |                                                                  |
|                                                                                              | Risp                                                                    | Lower half of dose range                 | 4-6mg                  |                                           | 2-6 mg                               |                                                                                                                                                                                                   | <4mg (B,3)           |                    | 2-6 mg                                                                                                                           | 2-3mg                                                            |
|                                                                                              | Arip                                                                    | Insufficient evidence for recommendation | 10-15mg                |                                           | 10-30mg                              |                                                                                                                                                                                                   |                      |                    | 10-15 mg                                                                                                                         | 15-20mg                                                          |
|                                                                                              | Quet                                                                    | 500- 600mg                               | 300-450mg              |                                           | 300-800mg                            |                                                                                                                                                                                                   |                      |                    | 300-750 mg                                                                                                                       | 300-400mg. Rapid dose adaptation from starting dose recommended. |
|                                                                                              | Ami                                                                     |                                          | 400-800ng              |                                           | 400-800mg                            |                                                                                                                                                                                                   |                      |                    |                                                                                                                                  | 300-400mg                                                        |
|                                                                                              | Palip                                                                   |                                          | 3-12 mg                |                                           | 6-10mg                               |                                                                                                                                                                                                   |                      |                    |                                                                                                                                  |                                                                  |
| Asen                                                                                         |                                                                         |                                          |                        |                                           |                                      |                                                                                                                                                                                                   |                      |                    |                                                                                                                                  |                                                                  |
| Zip                                                                                          | Insufficient evidence for recommendation                                | 80mg                                     |                        | 80-160mg                                  |                                      |                                                                                                                                                                                                   |                      | 160 mg (with food) | 80-120mg                                                                                                                         |                                                                  |
| Sert                                                                                         |                                                                         | 12-20mg                                  |                        |                                           |                                      |                                                                                                                                                                                                   |                      |                    |                                                                                                                                  |                                                                  |
| Duration of initial trial of antipsychotic and when to switch medication due to non-response |                                                                         | 4-6 weeks (Not graded)                   | 6-8 weeks (not graded) | 4-6 weeks (A, 1++)                        | 4 weeks (A)                          | 2-8 weeks (extrapolated from the definition of TRS, not graded) Minimum of three weeks and maximum                                                                                                | 2-4 weeks (D)        | 4-6 weeks          | 4-6 weeks                                                                                                                        | 3 weeks                                                          |

|                                                                                               |                                                |                                                                                                                                                                                                                                                                                                                                                                                |                                                                                   |                                                                                                                                                                   |                                                                                                                            |                                                                                                                                                                                                                                                                                                                                                    |                                                                |                                                                                                                                                                |                                                                               |                                                                                                      |
|-----------------------------------------------------------------------------------------------|------------------------------------------------|--------------------------------------------------------------------------------------------------------------------------------------------------------------------------------------------------------------------------------------------------------------------------------------------------------------------------------------------------------------------------------|-----------------------------------------------------------------------------------|-------------------------------------------------------------------------------------------------------------------------------------------------------------------|----------------------------------------------------------------------------------------------------------------------------|----------------------------------------------------------------------------------------------------------------------------------------------------------------------------------------------------------------------------------------------------------------------------------------------------------------------------------------------------|----------------------------------------------------------------|----------------------------------------------------------------------------------------------------------------------------------------------------------------|-------------------------------------------------------------------------------|------------------------------------------------------------------------------------------------------|
|                                                                                               |                                                |                                                                                                                                                                                                                                                                                                                                                                                |                                                                                   |                                                                                                                                                                   |                                                                                                                            | of 6 weeks described in a different section (not graded)                                                                                                                                                                                                                                                                                           |                                                                |                                                                                                                                                                |                                                                               |                                                                                                      |
| Duration of initial trial of antipsychotic medication trial where there is a partial response |                                                |                                                                                                                                                                                                                                                                                                                                                                                |                                                                                   |                                                                                                                                                                   |                                                                                                                            | 4-10 weeks and 5-11 weeks for the second antipsychotic (not graded)                                                                                                                                                                                                                                                                                | 8 weeks (D)                                                    |                                                                                                                                                                |                                                                               | 6-8 weeks                                                                                            |
| Second line antipsychotic medication                                                          | FGA or SGA                                     | SGA eg Risp, Olz, Quet, Ami, Ari (A)                                                                                                                                                                                                                                                                                                                                           | Switching to atypical confers no advantage in terms of quality of life (Grade A). | SGA or FGA (D, 4)                                                                                                                                                 | SGA or FGA. Should use an AP with a favourable efficacy profile before moving to clozapine (A)                             | SGA if initial antipsychotic was FGA (B, 3)                                                                                                                                                                                                                                                                                                        | FGA or SGA (extrapolated from definition of TRS)               | FGA or SGA. Prefer Risp, Olz or FGA if not previously used. If one was used in initial treatment then use any AP except Cloz.                                  | Offer oral FGA or SGA                                                         | Another SGA including option of Olz                                                                  |
| Duration of second trial of antipsychotic medication                                          |                                                | 6-8 weeks (C) Although in the algorithm it states 4-6 weeks (not graded)                                                                                                                                                                                                                                                                                                       | 6-8 weeks (Not graded)                                                            |                                                                                                                                                                   |                                                                                                                            | 2-8 weeks (extrapolated from the definition of TRS, not graded)<br><br>5-11 weeks for the second antipsychotic if partial response (not graded)                                                                                                                                                                                                    |                                                                | 4-6 weeks                                                                                                                                                      |                                                                               |                                                                                                      |
| Role of long acting injection or depot antipsychotic                                          | For maintenance treatment if preferred to oral | Reserved for those who choose this route. Those who repeatedly fail to adhere despite psychosocial and interventions aimed at adaptation and adherence (C in one section and B in another)<br><br>If there is no response to treatment or low adherence with frequent relapses, low dose first generation depot antipsychotics should be tried for a period of 3-6 months (C). | If non-adherent (Grade A in one section and Grade B in another section)           | If patient preference or if treatment adherence is an issue (C, 2+)<br><br>Not for acute episodes because they may take 3-6 months to reach steady state (B, 2++) | Role uncertain for FE schizophrenia. Patient-specific intervention for improving adherence or if preference of patient (S) | Good evidence for FGA depots in relapse prevention (A,1) but no clear difference in efficacy between oral and depot (A,1)<br><br>Good evidence for Risp LAI in relapse prevention (A,1) and some evidence of superiority over oral formulation (C,4). Also some evidence for use in FE (B,3)<br><br>Evidence for Pal LAI (A,1); Olz LAI (A/B, 2/3) | Service user preference, medication adherence difficulties (B) | Not routine use. If non-adherent. Although may be necessary to ensure an adequate trial for the initial antipsychotic stage of an episode of FE schizophrenia. | Patient preference. When avoiding covert non-adherence is a clinical priority | If poor or uncertain adherence or if persons preference or poor response to oral medication (EBR II) |
| Combination antipsychotics                                                                    |                                                | Not recommended                                                                                                                                                                                                                                                                                                                                                                | Monotherapy whenever                                                              | Not recommended except for switching                                                                                                                              | High dose or combined AP for                                                                                               | Monotherapy recommended (C3, 4)                                                                                                                                                                                                                                                                                                                    | Should not be routine. If considered                           | Cloz augmentation.                                                                                                                                             | Do not initiate. Check PRN use of                                             | If adequate response is not                                                                          |

|                                                                              |            |                                                           |                                                                                                                        |                                      |                                                                                                                                                                                                                                                                    |                                                                                                                                                                                                                                                                             |                                                                                                                                                                                                                                |                                                                    |                                                        |                                                                                                                                                                                                                                                    |
|------------------------------------------------------------------------------|------------|-----------------------------------------------------------|------------------------------------------------------------------------------------------------------------------------|--------------------------------------|--------------------------------------------------------------------------------------------------------------------------------------------------------------------------------------------------------------------------------------------------------------------|-----------------------------------------------------------------------------------------------------------------------------------------------------------------------------------------------------------------------------------------------------------------------------|--------------------------------------------------------------------------------------------------------------------------------------------------------------------------------------------------------------------------------|--------------------------------------------------------------------|--------------------------------------------------------|----------------------------------------------------------------------------------------------------------------------------------------------------------------------------------------------------------------------------------------------------|
|                                                                              |            | except when switching (B)                                 | possible (Grade A in one section and Grade C in another)<br><br>Combination with clozapine may be considered (Grade A) | or clozapine augmentation (B, 2++)-  | TRS only after failure of several, adequate sequential trials of AP monotherapy and other evidence based treatments for TRS including clozapine (B).<br><br>If used use a closely monitored, time-limited trial (D).                                               | May be advisable in some individual circumstances (C3,4). Monitor at frequent intervals (C3,4)<br>Cloz augmentation                                                                                                                                                         | for an individual situation, discuss benefits and harms with service user (GPP)<br><br>Cloz augmentation as above                                                                                                              | Or an option if augmentation strategies with cloz have not worked. | AP. Clozapine augmentation strategy.                   | achieved after monotherapy treatment trials of two antipsychotic agents given separately at therapeutic doses, antipsychotic polypharmacy may be justifiable but requires careful monitoring (EBR II)                                              |
| <i>Maintenance of remission</i>                                              |            |                                                           |                                                                                                                        |                                      |                                                                                                                                                                                                                                                                    |                                                                                                                                                                                                                                                                             |                                                                                                                                                                                                                                |                                                                    |                                                        |                                                                                                                                                                                                                                                    |
| Duration of maintenance treatment following a first episode of schizophrenia |            | 12 months (C)                                             | 1-2 years (not graded)                                                                                                 |                                      |                                                                                                                                                                                                                                                                    | Treat for at least one year (C,4)                                                                                                                                                                                                                                           | At least 18 months (D)                                                                                                                                                                                                         |                                                                    | High risk of relapse if discontinued in next 1-2 years | Provide an adequate duration of treatment (EBR II)<br><br>A minimum of 12 months following remission is suggested in the text (not graded).<br><br>Continue to engage with first episode for schizophrenia service for at least 2-5 years (EBR II) |
| Choice of AP for maintenance                                                 | FGA or SGA | Continue with treatment used in acute phase (not graded). | Use AP for relapse prevention (Grade A)<br><br>No difference amongst Aps in efficacy for relapse prevention (Grade A)  | Same as used for acute phase (A, 1+) | Antipsychotic medication required (A)<br><br>Consider factors as for first episode plus:<br>Prior treatment response (S)<br>Experience of side effects (S)<br>Level of medication adherence (S).<br>Comorbid physical illness (S)<br>Long term treatment plan (S). | SGA because:<br><br>Evidence for superiority of Risp, Olz and Sert for treatment discontinuation and relapse prevention (B,3).<br><br>Reduced risk of motor side effects (C,4)<br><br>Some advantage in reducing negative symptoms (C,4)<br><br>Use antipsychotic with best | Offer maintenance with antipsychotic (A)<br><br>Use medication that was used during acute phase assuming efficacy and tolerability (GPP)<br><br>Olz, Ami, Risp preferred with CPZ and other low potency FGA an alternative (B) | Not Quet                                                           |                                                        |                                                                                                                                                                                                                                                    |

|                                                                                                                       |                                                                                                    |  |  |                                                                                          |                                                                                         |                                                                                                                                                                    |                                                  |  |                                                                                                           |  |
|-----------------------------------------------------------------------------------------------------------------------|----------------------------------------------------------------------------------------------------|--|--|------------------------------------------------------------------------------------------|-----------------------------------------------------------------------------------------|--------------------------------------------------------------------------------------------------------------------------------------------------------------------|--------------------------------------------------|--|-----------------------------------------------------------------------------------------------------------|--|
|                                                                                                                       |                                                                                                    |  |  |                                                                                          |                                                                                         | benefit/tolerability profile in acute phase (Good clinical practice)                                                                                               |                                                  |  |                                                                                                           |  |
| Dose of maintenance medication following a first episode of schizophrenia (evidence from multi-episode schizophrenia) | 300-600 mg Cpz Eq. SGA dose effective in acute phase                                               |  |  | Dose should not be lower than half of the effective dose used in the acute phase (A, 1+) | Any reduction in dose should be closely monitored. Consider risk of destabilisation (C) | <600 mg Cpz Eq.<br><br>FE patients require lower doses than multi-episode (C,4)<br><br>Dose in accordance with stabilisation dose (C,4)                            | 300-400 mg CPZ Eq, 4-6 mg Risp or equivalent (B) |  |                                                                                                           |  |
| Targeted intermittent dosing strategies                                                                               | Not recommended in preference to continuous maintenance treatment regimens due to risk of relapse. |  |  |                                                                                          | Should not be used in preference to continued AP treatment (B).                         | Continuous use for relapse prevention strongly recommended (A,1).<br><br>Consider if patient unwilling to accept continuous maintenance or side effect sensitivity |                                                  |  | Not routinely. Consider if patient unwilling to accept continuous maintenance or side effect sensitivity. |  |

*Treatment resistance*

When to offer a trial of clozapine

|                                                                             |                                                                                                                                                            |                                                                                                                                                                   |                                                                                                                                                                |              |                                                                                                                                                                                     |                                                                                                                                                                                                                                                                                                                     |                                                                                                     |                                                                                                                         |                           |                                                                                                                                                                                                                                                               |
|-----------------------------------------------------------------------------|------------------------------------------------------------------------------------------------------------------------------------------------------------|-------------------------------------------------------------------------------------------------------------------------------------------------------------------|----------------------------------------------------------------------------------------------------------------------------------------------------------------|--------------|-------------------------------------------------------------------------------------------------------------------------------------------------------------------------------------|---------------------------------------------------------------------------------------------------------------------------------------------------------------------------------------------------------------------------------------------------------------------------------------------------------------------|-----------------------------------------------------------------------------------------------------|-------------------------------------------------------------------------------------------------------------------------|---------------------------|---------------------------------------------------------------------------------------------------------------------------------------------------------------------------------------------------------------------------------------------------------------|
| If non-response following adequate trial of two AP's one of which is an SGA | Yes                                                                                                                                                        | Yes (A)                                                                                                                                                           | Yes (Grade A)                                                                                                                                                  | Yes (A, 1++) | Yes (A)                                                                                                                                                                             | Yes (B,3)                                                                                                                                                                                                                                                                                                           | Yes (B)                                                                                             | Yes                                                                                                                     | Yes                       | Yes (EBR I)                                                                                                                                                                                                                                                   |
| Other considerations regarding clozapine use                                | Trial clozapine for hostility or violent behaviour.<br>Trial of clozapine for those who exhibit significant or persistent suicidal thoughts or behaviours. | Also indicated in persistent or high risk of suicide despite treatment for depression if present (A).<br><br>SGA eg Olz and Risp trial before diagnosing TRS (C). | Clozapine superior in treating persistent aggression (Grade A)<br><br>Clozapine indicated in treatment of persistent suicidal thoughts or behaviours (Grade A) |              | Consider trial for aggression or hostility (B).<br><br>Consider if persistent substance misuse (D).<br><br>Consider if intolerant to neurologic side effects of antipsychotics (A). | One SGA previously. Non response to two antipsychotics in previous 5 years. Trial at adequate dose for 2-8 weeks. (not graded)<br><br>If intolerant to Cloz, try Olz or Risp (B,3).<br><br>Consider Cloz if significant and continuous increased risk of suicide (B,3)<br><br>Cloz may reduce craving in concurrent | One SGA in previous trial (B)<br>If TRS accompanied by aggression/ hostility consider clozapine (D) | Previous trial of Risp, Olz or FGA<br><br>More effective if presentation includes hostility and for suicide prevention. | One SGA in previous trial | When treatment resistance has been clearly demonstrated, clozapine should be offered within 6-12 months. (EBR, I)<br><br>In another section an evidence level of EBR II is attached to the statement 'treatment resistant disease should be recognised within |

|                                             |                                           |                              |                                                                                                  |                                                                           |                                                                                                                                                                                        |                                                                                                          |                                                                                                                       |                                                      |                                                           |                                                                                                                               |
|---------------------------------------------|-------------------------------------------|------------------------------|--------------------------------------------------------------------------------------------------|---------------------------------------------------------------------------|----------------------------------------------------------------------------------------------------------------------------------------------------------------------------------------|----------------------------------------------------------------------------------------------------------|-----------------------------------------------------------------------------------------------------------------------|------------------------------------------------------|-----------------------------------------------------------|-------------------------------------------------------------------------------------------------------------------------------|
|                                             |                                           |                              |                                                                                                  |                                                                           |                                                                                                                                                                                        | alcohol use disorder (B,3); and other substance use disorder (C3,4) but consider risk of non-compliance. |                                                                                                                       |                                                      |                                                           | 6-12 months of starting potentially effective antipsychotic treatment and confirmed as soon as possible.                      |
| Clozapine dose                              | Blood level > 350ng/ml.<br>300-800mg/ day | 200-450mg/day                |                                                                                                  | Blood level > 350ng/ml.<br>100-450 mg/ day<br>(Recommendation not graded) | Plasma level can guide dose (D)                                                                                                                                                        | Blood level > 350ng/ml.<br>100-900mg/ day<br>(B/C3; 3/4)                                                 |                                                                                                                       | Blood level 350-450ng/mL<br>Usual dose 300-400mg/day |                                                           |                                                                                                                               |
| Adequate duration of clozapine trial?       | At least 8 weeks                          | 4-6 weeks (Not graded)       |                                                                                                  |                                                                           | 3-6 months (B)                                                                                                                                                                         |                                                                                                          | NR                                                                                                                    |                                                      |                                                           | If possible a trial of clozapine should be continued for 12 months to allow for late responders (EBR I).                      |
| Clozapine augmentation strategies           |                                           | Addition of a second SGA (C) | Combination with of AP clozapine may be considered (Grade A)<br><br>Clozapine + ECT (Not graded) | Another AP or ECT (Recommendation not graded)                             | Only consider if optimised clozapine treatment for minimum of 3 months (S).<br><br>Use medication that has complementary receptor profile and does not dose not compound SE (B)        | Some evidence for adding SGA (C,4)<br><br>Ltg augmentation might improve symptoms (B,3).                 | Add other SGA for trial period (C)<br><br>Consider trial of Cloz + Ltg (B)                                            | Add Risp; add other AP, LTG,                         | Add other AP considering SE profile                       | Adjunctive medication with clozapine or reinstate most efficacious previous treatment and add adjunctive medication (EBR II). |
| Duration of trial of augmentation strategy? |                                           |                              |                                                                                                  |                                                                           | At least 10 weeks (B)                                                                                                                                                                  |                                                                                                          | 10 weeks for augmentation with SGA (C)                                                                                |                                                      | 8-10 weeks                                                |                                                                                                                               |
| High dose antipsychotics                    |                                           |                              |                                                                                                  |                                                                           | Not recommended unless all evidence based treatments for TRS have been optimised and failed. Time limited trial (B)<br><br>Continue after 3 months only if benefit outweighs risk (S). | Not recommended (not graded)                                                                             | Trial if clozapine and augmentation strategies have failed (D). Need to develop local guidelines for monitoring (GPP) | Not recommended                                      | Do not use loading dose. Caution with additional PRN AP's |                                                                                                                               |

|                                                                  |  |  |                                                                                                                                     |                                                                                                                            |  |                                                         |  |                                                                                                                                                                                                                                                                                                                                                                                      |  |  |
|------------------------------------------------------------------|--|--|-------------------------------------------------------------------------------------------------------------------------------------|----------------------------------------------------------------------------------------------------------------------------|--|---------------------------------------------------------|--|--------------------------------------------------------------------------------------------------------------------------------------------------------------------------------------------------------------------------------------------------------------------------------------------------------------------------------------------------------------------------------------|--|--|
| <p>Unsatisfactory improvement despite clozapine augmentation</p> |  |  | <p>Information appears in algorithm not in main text and is not graded.</p> <p>AP combinations, AP + ECT, AP + mood stabiliser.</p> | <p>AP combinations<br/>AP + ECT<br/>AP plus another augmenting agent e.g. mood stabiliser. (Recommendation not graded)</p> |  | <p>Inconsistent evidence for memantine in TRS (D,5)</p> |  | <p>Options presented below. Note sparse evidence. Not listed in order of preference.</p> <p>Try a different clozapine augmentation strategy.</p> <p>Add memantine or omega 3 fatty acid to clozapine.</p> <p>Stop cloz and try AP not previously tried.</p> <p>Stop Cloz. Try combination of FGA and mirtazapine or celecoxib.</p> <p>Try combinations of AP not including cloz.</p> |  |  |
|------------------------------------------------------------------|--|--|-------------------------------------------------------------------------------------------------------------------------------------|----------------------------------------------------------------------------------------------------------------------------|--|---------------------------------------------------------|--|--------------------------------------------------------------------------------------------------------------------------------------------------------------------------------------------------------------------------------------------------------------------------------------------------------------------------------------------------------------------------------------|--|--|

Abbreviations: AP= Antipsychotic; CPZ Eq = Chlorpromazine Equivalents; ECT = electroconvulsive therapy; EPSE = Extrapyramidal side effects; FE = First Episode; FGA = First generation antipsychotic; LAI = Long Acting Injection; PRN = 'Pro re nata' as required; SE = side effect; SGA = Second generation antipsychotic; TD = Tardive Dyskinesia; TRS = Treatment resistant schizophrenia

Medications: Ami= Amisulpride; Ari = Aripiprazole; BDZ = Benzodiazepine; Cloz = clozapine; CPZ = chlorpromazine; Hpd = haloperidol; Olz = Olanzapine; Palip= Paliperidone; Quet = Quetiapine; Risp = Risperidone; Sert= sertindole; Sulp= sulpiride; Triflu = trifluoperazine; Zip = ziprasidone
